# Supplementary material for: Longitudinal Association of Total Tau Concentrations and Physical Activity With Cognitive Decline in a Population Sample
Source: PubMed Central journal article supplement (PMC8358733; doi:10.1001/jamanetworkopen.2021.20398), 2021-08-11
Supplement: jamanetwopen-e2120398-s001.pdf [file jamanetwopen-e2120398-s001.pdf]

## Supplementary Online Content

Desai P, Evans D, Dhana K, et al. Longitudinal association of total tau concentrations and physical activity with cognitive decline in a population sample. *JAMA Netw Open*. 2021;4(8):e2120398. doi:10.1001/jamanetworkopen.2021.20398

**eFigure.** Number of Participants by Physical Activity and Total Tau Group

**eTable 1.** Longitudinal Association of Continuous Variables: Physical Activity and Total Tau With Cognitive Outcomes

**eTable 2.** Longitudinal Association of Categorical Variables: Physical Activity and Total Tau With Global Cognitive Function

**eTable 3.** Longitudinal Association of Categorical Variables: Physical Activity and Total Tau With Cognitive Outcomes

**eTable 4.** Baseline Level of Episodic Memory, Perceptual Speed and MMSE

This supplementary material has been provided by the authors to give readers additional information about their work.

**eFigure.** Number of Participants by Physical Activity and Total Tau Group

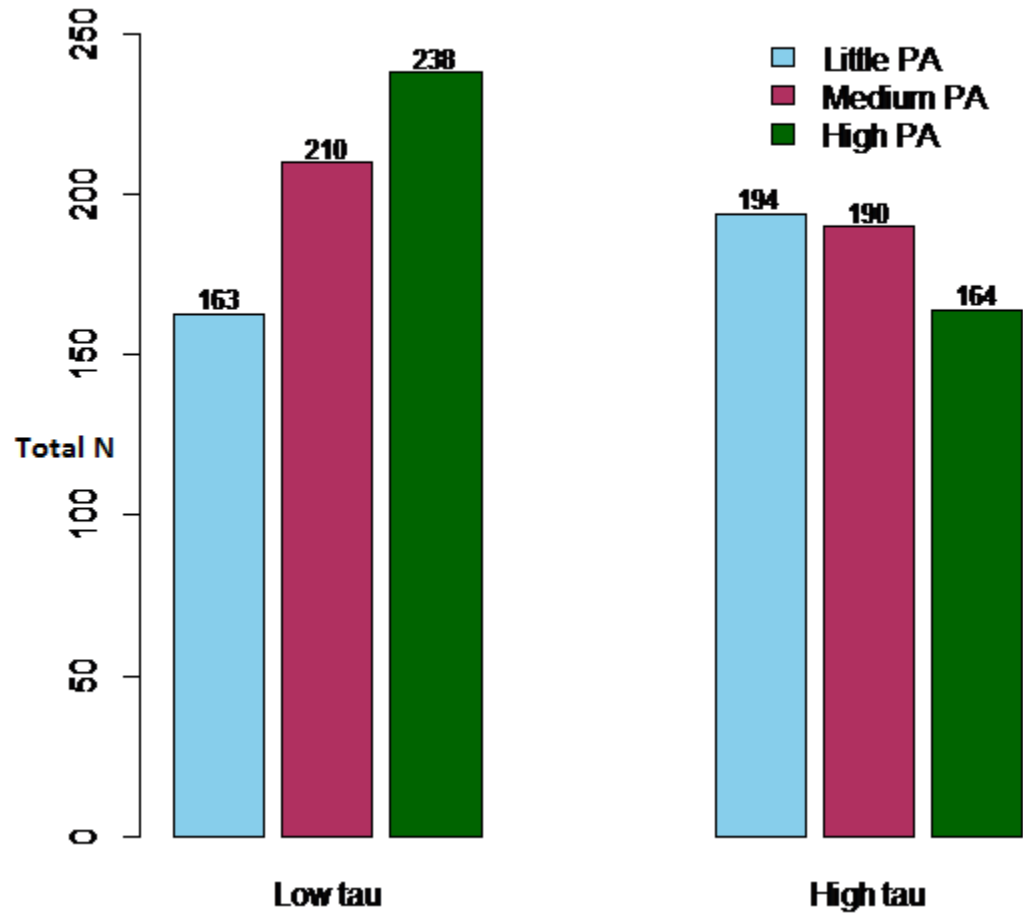

**eTable 1.** Longitudinal Association of Continuous Variables: Physical Activity and Total Tau With Cognitive Outcomes

|                        | Global Cognition (N=1159) |       |         | Episodic Memory (N=1150) |       |         | Perceptual Speed (N=1120) |       |         | MMSE (N=1160) |       |         |
|------------------------|---------------------------|-------|---------|--------------------------|-------|---------|---------------------------|-------|---------|---------------|-------|---------|
|                        | $\beta$                   | SE    | p-value | $\beta$                  | SE    | p-value | $\beta$                   | SE    | p-value | $\beta$       | SE    | p-value |
| <b>Intercept</b>       | 0.408                     | 0.050 | 0.000** | 0.273                    | 0.064 | 0.000** | 0.717                     | 0.060 | 0.000** | 0.406         | 0.047 | 0.000** |
| <b>time</b>            | -0.057                    | 0.009 | 0.000** | -0.033                   | 0.011 | 0.003** | -0.069                    | 0.009 | 0.000** | -0.075        | 0.011 | 0.000** |
| <b>age</b>             | -0.021                    | 0.004 | 0.000** | -0.014                   | 0.005 | 0.004** | -0.031                    | 0.004 | 0.000** | -0.018        | 0.003 | 0.000** |
| <b>age*time</b>        | -0.005                    | 0.001 | 0.000** | -0.005                   | 0.001 | 0.000** | -0.002                    | 0.001 | 0.007** | -0.005        | 0.001 | 0.000** |
| <b>Log tau</b>         | -0.014                    | 0.048 | 0.780   | 0.038                    | 0.062 | 0.545   | -0.088                    | 0.058 | 0.128   | -0.027        | 0.045 | 0.554   |
| <b>Log tau*time</b>    | -0.019                    | 0.009 | 0.035*  | -0.023                   | 0.011 | 0.031*  | -0.006                    | 0.009 | 0.508   | -0.023        | 0.011 | 0.036   |
| <b>Baseline PA</b>     | 0.000                     | 0.007 | 0.988   | -0.002                   | 0.009 | 0.872   | 0.012                     | 0.009 | 0.161   | -0.002        | 0.007 | 0.760   |
| <b>PA*time</b>         | 0.001                     | 0.001 | 0.502   | 0.001                    | 0.002 | 0.540   | 0.002                     | 0.001 | 0.198   | 0.000         | 0.002 | 0.943   |
| <b>PA*age</b>          | 0.000                     | 0.001 | 0.914   | 0.000                    | 0.001 | 0.825   | -0.001                    | 0.001 | 0.484   | 0.000         | 0.001 | 0.891   |
| <b>PA*age*time</b>     | 0.000                     | 0.000 | 0.633   | 0.000                    | 0.000 | 0.263   | 0.000                     | 0.000 | 0.219   | 0.000         | 0.000 | 0.379   |
| <b>Log tau*PA</b>      | -0.002                    | 0.009 | 0.786   | -0.005                   | 0.012 | 0.684   | 0.011                     | 0.011 | 0.305   | -0.001        | 0.008 | 0.904   |
| <b>Log tau*PA*time</b> | 0.000                     | 0.002 | 0.780   | 0.001                    | 0.002 | 0.561   | 0.001                     | 0.002 | 0.395   | -0.001        | 0.002 | 0.547   |

All models adjusted for age, race, sex, education, chronic medical conditions, and APOE4 and each of their interactions with time.  
p<.05\*, p<.01\*\*

**eTable 2.** Longitudinal Association of Categorical Variables: Physical Activity and Total Tau With Global Cognitive Function

|                       | Low Total Tau (N=611) |       |         | High Total Tau (N=548) |       |         |
|-----------------------|-----------------------|-------|---------|------------------------|-------|---------|
|                       | $\beta$               | SE    | p-value | $\beta$                | SE    | p-value |
| <b>Intercept</b>      | 0.280                 | 0.068 | 0.000** | 0.442                  | 0.078 | 0.000** |
| <b>time</b>           | -0.051                | 0.011 | 0.000** | -0.066                 | 0.016 | 0.000** |
| <b>Medium PA</b>      | 0.131                 | 0.059 | 0.027** | 0.037                  | 0.064 | 0.569   |
| <b>High PA</b>        | 0.115                 | 0.061 | 0.062   | 0.037                  | 0.070 | 0.595   |
| <b>Medium PA*time</b> | 0.001                 | 0.010 | 0.959   | 0.038                  | 0.014 | 0.006** |
| <b>High PA *time</b>  | 0.014                 | 0.010 | 0.187   | 0.027                  | 0.015 | 0.066   |

\*PA: Little activity (responded to at least four items and reported little activity for all responses), Medium activity (< 150 mins/ wk), High activity ( $\geq$ 150 mins/ wk)  
 Little activity is referent.

Total Tau: Low ( $\leq$  .40 pg/mL), High (> .40 pg/mL)

All models adjusted for age, race, sex, education, chronic medical conditions, and APOE4 and each of their interactions with time.  
 p<.05\*, p<.01\*\*

**eTable 3.** Longitudinal Association of Categorical Variables: Physical Activity and Total Tau With Cognitive Outcomes

|                       | Episodic Memory       |       |                 |                        |       |                 | Perceptual Speed      |       |                 |                        |       |                 | MMSE                  |       |                 |                        |       |                 |
|-----------------------|-----------------------|-------|-----------------|------------------------|-------|-----------------|-----------------------|-------|-----------------|------------------------|-------|-----------------|-----------------------|-------|-----------------|------------------------|-------|-----------------|
|                       | Low Total Tau (N=607) |       |                 | High Total Tau (N=543) |       |                 | Low Total Tau (N=599) |       |                 | High Total Tau (N=521) |       |                 | Low Total Tau (N=611) |       |                 | High Total Tau (N=549) |       |                 |
|                       | $\beta$               | SE    | <i>p</i> -value | $\beta$                | SE    | <i>p</i> -value | $\beta$               | SE    | <i>p</i> -value | $\beta$                | SE    | <i>p</i> -value | $\beta$               | SE    | <i>p</i> -value | $\beta$                | SE    | <i>p</i> -value |
| <b>Intercept</b>      | 0.119                 | 0.089 | 0.182           | 0.279                  | 0.098 | 0.005**         | 0.668                 | 0.085 | 0.000           | 0.819                  | 0.093 | 0.000**         | 0.321                 | 0.061 | 0.000**         | 0.414                  | 0.076 | 0.000**         |
| <b>time</b>           | -0.021                | 0.014 | 0.129           | -0.035                 | 0.019 | 0.068           | -0.070                | 0.012 | 0.000           | -0.091                 | 0.016 | 0.000**         | -0.077                | 0.013 | 0.000**         | -0.077                 | 0.021 | 0.000**         |
| <b>Medium PA</b>      | 0.139                 | 0.078 | 0.075           | 0.088                  | 0.081 | 0.281           | 0.090                 | 0.074 | 0.223           | 0.003                  | 0.076 | 0.964           | 0.067                 | 0.053 | 0.207           | 0.013                  | 0.062 | 0.831           |
| <b>High PA</b>        | 0.112                 | 0.080 | 0.161           | -0.003                 | 0.088 | 0.969           | 0.074                 | 0.076 | 0.333           | 0.068                  | 0.082 | 0.407           | 0.066                 | 0.055 | 0.226           | 0.083                  | 0.068 | 0.219           |
| <b>Medium PA*time</b> | -0.008                | 0.013 | 0.552           | 0.026                  | 0.017 | 0.117           | 0.011                 | 0.011 | 0.329           | 0.031                  | 0.014 | 0.025*          | 0.015                 | 0.012 | 0.209           | 0.047                  | 0.018 | 0.007**         |
| <b>High PA*time</b>   | 0.007                 | 0.013 | 0.613           | 0.036                  | 0.018 | 0.049           | 0.016                 | 0.011 | 0.134           | 0.031                  | 0.015 | 0.034*          | 0.025                 | 0.012 | 0.034*          | 0.014                  | 0.019 | 0.456           |

\*PA: Little activity (responded to at least four items and reported little activity for all responses), Medium activity (< 150 mins/ wk), High activity (>150 mins/ wk)

Little activity is referent

Total Tau: Low ( $\leq$  .40 pg/mL), High ( $>$  .40 pg/mL)

All models adjusted for age, race, sex, education, chronic medical conditions, and APOE4 and each of their interactions with time.

$p < .05^*$ ,  $p < .01^{**}$

**eTable 4.** Baseline Level of Episodic Memory, Perceptual Speed and MMSE

| <b>Episodic Memory</b>  |                          |                 |                            |                 |                     |
|-------------------------|--------------------------|-----------------|----------------------------|-----------------|---------------------|
|                         | <b>Estimate (95% CI)</b> |                 | <b>Difference (95% CI)</b> |                 | <b>% Difference</b> |
| <b>Low Tau</b>          |                          |                 |                            |                 |                     |
| Little PA               | 0.119                    | (-0.056, 0.294) | Ref                        |                 | Ref                 |
| Medium PA               | 0.258                    | (0.098, 0.417)  | 0.139                      | (-0.014, 0.292) | >100%               |
| High PA                 | 0.232                    | (0.085, 0.378)  | 0.112                      | (-0.045, 0.27)  | 94%                 |
| <b>High Tau</b>         |                          |                 |                            |                 |                     |
| Little PA               | 0.279                    | (0.087, 0.471)  | Ref                        |                 | Ref                 |
| Medium PA               | 0.366                    | (0.181, 0.552)  | 0.088                      | (-0.072, 0.247) | 32%                 |
| High PA                 | 0.275                    | (0.092, 0.459)  | -0.003                     | (-0.176, 0.169) | 1%                  |
| <b>Perceptual Speed</b> |                          |                 |                            |                 |                     |
|                         | <b>Estimate (95% CI)</b> |                 | <b>Difference (95% CI)</b> |                 | <b>% Difference</b> |
| <b>Low Tau</b>          |                          |                 |                            |                 |                     |
| Little PA               | 0.668                    | (0.501, 0.835)  | Ref                        |                 | Ref                 |
| Medium PA               | 0.758                    | (0.605, 0.91)   | 0.090                      | (-0.055, 0.235) | 13%                 |
| High PA                 | 0.741                    | (0.603, 0.88)   | 0.074                      | (-0.076, 0.223) | 11%                 |
| <b>High Tau</b>         |                          |                 |                            |                 |                     |
| Little PA               | 0.819                    | (0.638, 1.001)  | Ref                        |                 | Ref                 |
| Medium PA               | 0.823                    | (0.647, 0.998)  | 0.003                      | (-0.147, 0.153) | 0.37%               |
| High PA                 | 0.887                    | (0.714, 1.06)   | 0.068                      | (-0.093, 0.229) | 8%                  |
| <b>MMSE</b>             |                          |                 |                            |                 |                     |
|                         | <b>Estimate (95% CI)</b> |                 | <b>Difference (95% CI)</b> |                 | <b>% Difference</b> |
| <b>Low Tau</b>          |                          |                 |                            |                 |                     |
| Little PA               | 0.321                    | (0.202, 0.441)  | Ref                        |                 | Ref                 |
| Medium PA               | 0.388                    | (0.279, 0.497)  | 0.067                      | (-0.037, 0.171) | 21%                 |
| High PA                 | 0.388                    | (0.287, 0.488)  | 0.066                      | (-0.041, 0.174) | 21%                 |
| <b>High Tau</b>         |                          |                 |                            |                 |                     |
| Little PA               | 0.414                    | (0.265, 0.562)  | Ref                        |                 | Ref                 |
| Medium PA               | 0.427                    | (0.283, 0.571)  | 0.013                      | (-0.109, 0.136) | 3%                  |
| High PA                 | 0.497                    | (0.355, 0.639)  | 0.083                      | (-0.05, 0.216)  | 20%                 |

\*PA: Little activity (responded to at least four items and reported little activity for all responses), Medium activity (< 150 mins/ wk), High activity ( $\geq$ 150 mins/ wk)

Total Tau: Low ( $\leq$  .40 pg/mL), High (> .40 pg/mL)

All models adjusted for age, race, sex, education, chronic medical conditions, and APOE4.
